# Supplementary material
Source: MDPI journal article supplement (https://www.mdpi.com/2297-8739/8/10/166)
Supplement: s1 [file s1]

# Rolling Circle and Loop Mediated Isothermal Amplification Strategy for Ultrasensitive miRNA Detection

Zheng Cao <sup>1</sup>, Xianfeng Jiang <sup>1</sup>, Guizhou Xiao <sup>1</sup>, Mingcheng Xu <sup>2</sup>, Hui Liu <sup>2,\*</sup> and Sheng Cai <sup>1,2,\*</sup>

<sup>1</sup> Sir Run Run Shaw Hospital, School of Medicine, Zhejiang University, Hangzhou 310020, China; 3200053@zju.edu.cn (Z.C.); Jiangxianfeng@zju.edu.cn (X.J.); xiaoguizhou@zju.edu.cn (G.X.)

<sup>2</sup> Institute of Drug Metabolism and Pharmaceutical Analysis, College of Pharmaceutical Sciences, Zhejiang University, Hangzhou 310058, China; xumingcheng1989@163.com

\* Correspondence: lhui2010@zju.edu.cn (H.L.); caisheng@zju.edu.cn (S.C.)

**Table S1.** Pre-ligation system.

| Ingredients                                                | Volume      |
|------------------------------------------------------------|-------------|
| target miRNA or total RNA                                  | 5 µL        |
| Padlock probe (200 pmol/L)                                 | 1 µL        |
| heat at 65°C for 3 min then cool down to room temperature. |             |
| 10×T4 buffer                                               | 1 µL        |
| T4 DNA Ligase (350 U/µL)                                   | 0.2 µL      |
| Diethyl pyrocarbonate treated water                        | Up to 10 µL |

**Table S2.** LAMP system.

| Ingredients                                                            | Volume  |
|------------------------------------------------------------------------|---------|
| LAMP primer mix                                                        | 1 µL    |
| dNTP (10 mmol/L)                                                       | 1 µL    |
| 10×isothermal buffer                                                   | 2.5 µL  |
| Betaine (5 mol/L)                                                      | 5 µL    |
| MgSO <sub>4</sub> (100 mmol/L)                                         | 0.5 µL  |
| T4 ligase linked products                                              | 1 µL    |
| ddH <sub>2</sub> O                                                     | 9 µL    |
| pre-degeneration at 95°C for 5 min, then keep on ice for another 2 min |         |
| Bst 2.0 DNA polymerase (120 U/µL)                                      | 0.05 µL |
| 20×Evagreen                                                            | 1.25 µL |
| ddH <sub>2</sub> O                                                     | 3.7 µL  |

**Table S3.** The analytical sensitivity of the RC-LAMP method (n=10).

| miR-200a concentration | Numbers of positive test | RSD   |
|------------------------|--------------------------|-------|
| 1 fmol/L               | 10/10                    | 7.22% |
| 750 amol/L             | 10/10                    | 4.38% |
| 500 amol/L             | 10/10                    | 14.8% |
| 250 amol/L             | 4/10                     | NA    |
| 100 amol/L             | 0/10                     | NA    |

**Table S4.** Comparison of sensitivity for different miRNA assay methods.

| Analytical method | Advantages/<br>Disadvantages                                   | Target RNA       | Detection limit        |
|-------------------|----------------------------------------------------------------|------------------|------------------------|
| Fluorescence      | Sensitivity: medium;<br>Operation: simple;<br>Usability: good. | Let-7a           | 0.08 pM <sup>[1]</sup> |
|                   |                                                                | miR-126, miR-141 | 15 pM <sup>[2]</sup>   |
|                   |                                                                | miR-141          | 0.5 fM <sup>[3]</sup>  |
|                   |                                                                | miR-141          | 1 fM <sup>[4]</sup>    |
|                   |                                                                | miR-200a         | 500 aM <sup>[5]</sup>  |

|                                   |                                                                         |          |                          |
|-----------------------------------|-------------------------------------------------------------------------|----------|--------------------------|
| Electrochemical detection         | Sensitivity: excellent;<br>Operation: complex;<br>Usability: medium.    | Let-7a   | 6.3 pM <sup>[12]</sup>   |
|                                   |                                                                         | miR-141  | 0.045 fM <sup>[7]</sup>  |
|                                   |                                                                         | miR-21   | 10 aM <sup>[8]</sup>     |
|                                   |                                                                         | miR-107  | 100 aM <sup>[9]</sup>    |
| Surface-enhanced Raman Scattering | Sensitivity: good;<br>Operation: complex;<br>Usability: medium.         | miR-21   | 1 pM <sup>[10]</sup>     |
|                                   |                                                                         | miR-133a | 0.306 fM <sup>[11]</sup> |
|                                   |                                                                         |          |                          |
|                                   |                                                                         |          |                          |
| ICP-MS                            | Sensitivity: excellent;<br>Operation: complex;<br>Usability: excellent. | miR-21   | 41 aM <sup>[6]</sup>     |
| UV-Vis                            | Sensitivity: excellent;<br>Operation: complex;<br>Usability: medium.    | miR-21   | 8.6 aM <sup>[13]</sup>   |
| Fluorescence (this work)          | Sensitivity: good;<br>Operation: simple;<br>Usability: good.            | miR-200a | 500 aM                   |

**Table S5.** The validation of the matrix effect (n=3).

| Total RNA (ng) | Recovery (%) |      |      | Mean (%) | SD   | RSD  |
|----------------|--------------|------|------|----------|------|------|
|                | 1            | 2    | 3    |          |      |      |
| 250            | 98.4         | 97.2 | 96.3 | 97.3     | 1.05 | 1.08 |
| 500            | 96.5         | 96.7 | 99.1 | 97.4     | 1.45 | 1.48 |
| 1000           | 97.5         | 96.4 | 102  | 98.6     | 2.97 | 3.01 |
| 1500           | 82.6         | 85.1 | 76.3 | 81.3     | 4.53 | 5.58 |
| 2000           | 66.1         | 59.7 | 60.3 | 62.0     | 3.53 | 5.70 |

## Reference

- 1 J. Zhang, L. Zhao, L. Dong, X. Nie, Y. Cheng, *Talanta* **2018**, *190*, 475.
- 2 K. Wei, J. Zhao, Y. Qin, S. Li, Y. Huang, S. Zhao, *Talanta* **2018**, *189*, 437.
- 3 N. Zhang, X.M. Shi, H.Q. Guo, X.Z. Zhao, W.W. Zhao, J.J. Xu, H.Y. Chen, *Anal. Chem.* **2018**, *90*, 11892.
- 4 F. Causa, A. Aliberti, A.M. Cusano, E. Battista, P.A. Netti, *J. Am. Chem. Soc.* **2015**, *137*, 1758.
- 5 M. Xu, J. Ye, D. Yang, A.A. Abdullah Al-Maskri, H. Hu, C. Jung, S. Cai, S. Zeng, *Anal. Chim. Acta* **2019**, *1077*, 208.
- 6 S. Liu, H. Fang, C. Sun, N. Wang, J. Li, *Analyst* **2018**, *143*, 5137.
- 7 P. Miao, T. Zhang, J. Xu, Y. Tang, *Anal. Chem.* **2018**, *90*, 11154.
- 8 R. Tavallaie, J. McCarroll, M. Le Grand, N. Ariotti, W. Schuhmann, E. Bakker, R.D. Tilley, D.B. Hibbert, M. Kavallaris, J.J. Gooding, *Nat. Nanotechnol.* **2018**, *13*, 1066.
- 9 M.N. Islam, M.K. Masud, N.T. Nguyen, V. Gopalan, H.R. Alamri, Z.A. Alothman, M.S.A. Hossain, Y. Yamauchi, A.K. Lamd, M.J.A. Shiddiky, *Biosens. Bioelectron.* **2018**, *101*, 275.
- 10 K. Boriachek, M. Umer, M.N. Islam, V. Gopalan, A.K. Lam, N.T. Nguyen, M.J.A. Shiddiky, *Analyst* **2018**, *143*, 1662.
- 11 Y. Sun, T. Li, *Anal. Chem.* **2018**, *90*, 11614.
- 12 Z. Gao, C. Wu, S. Lv, C. Wang, N. Zhang, S. Xiao, Y. Han, H. Xu, Y. Zhang, F. Li, J. Lyu, Z. Shen, *Anal. Bioanal. Chem.* **2018**, *410*, 6819.
- 13 C. Zhang, D. Li, D. Li, K. Wen, X. Yang, Y. Zhu, *Analyst* **2019**, *144*, 3817.
